# Supplementary material
Source: MDPI journal article supplement (https://www.mdpi.com/2073-4344/13/12/1510)
Supplement: s1 [file s1]

# Supplementary Materials

## Co-Encapsulation of Rhenium and Ruthenium Complexes into the Scaffolds of Metal–Organic Framework to Promote CO<sub>2</sub> Reduction

Zhifang Su, Baolan Yu, Jianxin Feng, Maoling Zhong, Xuan Li and Jianying Shi \*

School of Chemistry, LIFM, IGCME, Sun Yat-Sen University, Guangzhou 510275, China

\* Correspondence: shijying@mail.sysu.edu.cn

### 1. The composition analysis of a serial of catalysts.

**Table S1.** The summary of feeding quantity and ICP content of Re-Ru@U and the corresponding CO yield.

| Re-Ru@U | Feed quantity (mmol)               |                                         | ICP content (wt%) |            | CO Yield (μmol/g) |
|---------|------------------------------------|-----------------------------------------|-------------------|------------|-------------------|
|         | Re(4,4'-dcbpy)(CO) <sub>3</sub> Cl | [Ru(dcbpy) <sub>3</sub> ] <sup>2+</sup> | Re element        | Ru element |                   |
| 1-1     | 0.008                              | $5.8 \times 10^{-4}$                    | 3.80              | 0.091      | 216.3             |
| 2-1     | 0.01                               | $5.8 \times 10^{-4}$                    | 2.45              | 0.11       | 1057.2            |
| 3-1     | 0.02                               | $5.8 \times 10^{-4}$                    | 2.30              | 0.088      | 537.4             |
| 1-2     | 0.008                              | $8.7 \times 10^{-4}$                    | 3.61              | 0.014      | 518.1             |
| 2-2     | 0.01                               | $8.7 \times 10^{-4}$                    | 2.69              | 0.17       | 876.1             |
| 3-2     | 0.02                               | $8.7 \times 10^{-4}$                    | 2.21              | 0.35       | 410.4             |
| 1-3     | 0.008                              | $11.6 \times 10^{-4}$                   | 3.65              | 0.15       | 719.9             |
| 2-3     | 0.01                               | $11.6 \times 10^{-4}$                   | 2.54              | 0.39       | 335.0             |
| 3-3     | 0.02                               | $11.6 \times 10^{-4}$                   | 2.49              | 0.43       | 282.2             |

### 2. PXRD, IR spectra and X-ray photoelectron spectra (XPS).

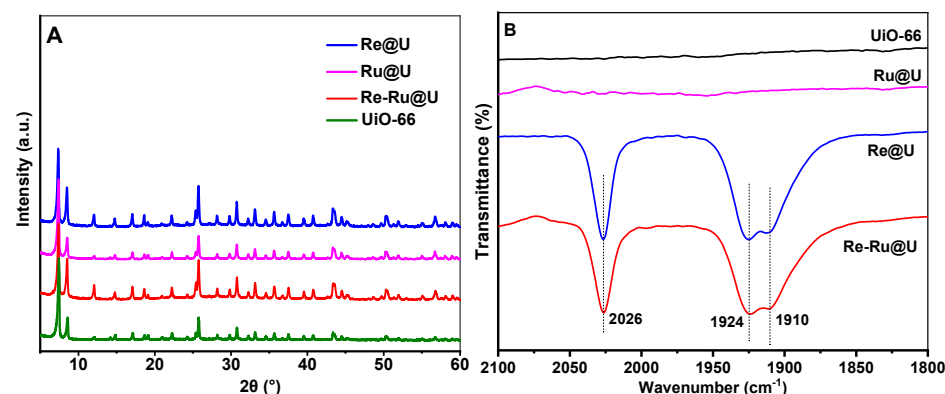

**Figure S1.** (A) PXRD and (B) IR spectra of ReC<sub>2</sub>, RuC<sub>6</sub>, Re-Ru@U, Re@U, Ru@U and UiO-66.

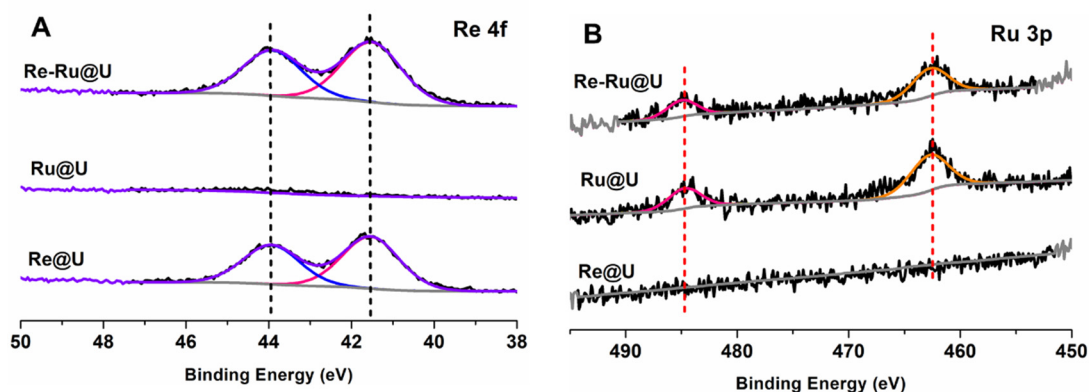

**Figure S2.** XPS binding energy of (A) Re 4f and (B) Ru 3p in samples of Re@U, Ru@U and Re-Ru@U.

### 3. The $^1\text{H}$ NMR spectra of the digested Re-Ru@U, Re@U and Ru@U.

All of the  $^1\text{H}$  NMR data were collected on Bruker AVANCE III 400 (400 MHz). For digestion, Samples were immersed in 400  $\mu\text{L}$   $\text{D}_2\text{O}$  solution with 1M  $\text{NH}_4\text{HCO}_3$  at room temperature and sonicated for 30 min to achieve clear solution. 20  $\mu\text{L}$  of  $\text{DMSO-}d_6$  as internal standard were added and sonicated for 15 min.

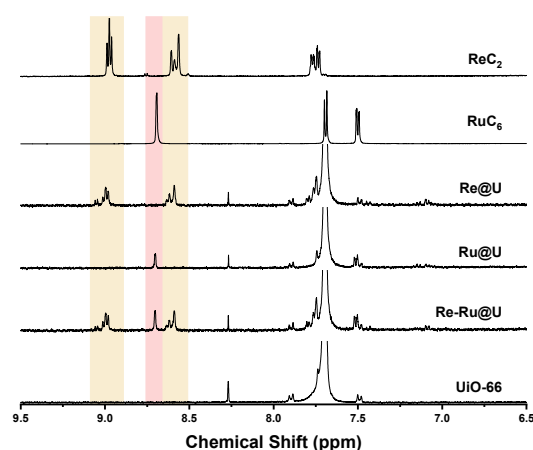

**Figure S3.**  $^1\text{H}$  NMR ( $\text{D}_2\text{O}$ - $\text{DMSO-}d_6$ ) spectra of pristine  $\text{ReC}_2$  and  $\text{RuC}_6$  complexes and the digested samples of Re-Ru@U, Re@U, Ru@U and UiO-66.

### 4. $\text{N}_2$ adsorption-desorption isotherms.

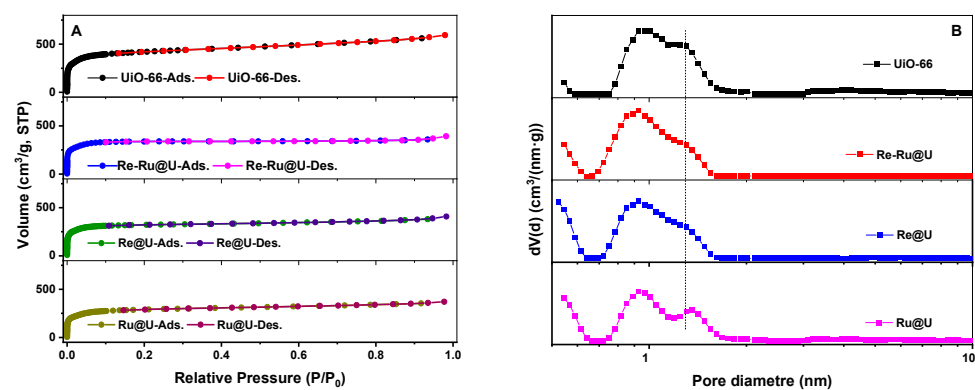

**Figure S4.** (A) 77K  $\text{N}_2$  adsorption and desorption isothermal curves and (B) cumulative pore size profiles for different assembled catalysts.

**Table S2.** BET surface areas and pore volumes.

| Samples | Surface area <sup>BET</sup> (m <sup>2</sup> /g) | V <sup>DFT</sup> (cm <sup>3</sup> /g) |
|---------|-------------------------------------------------|---------------------------------------|
| UiO-66  | 1696                                            | 0.877                                 |
| URu     | 1161                                            | 0.5743                                |
| URe     | 1233                                            | 0.589                                 |
| URuRu   | 1390                                            | 0.5564                                |

## 5. <sup>13</sup>CO<sub>2</sub> isotopic labeling experiment

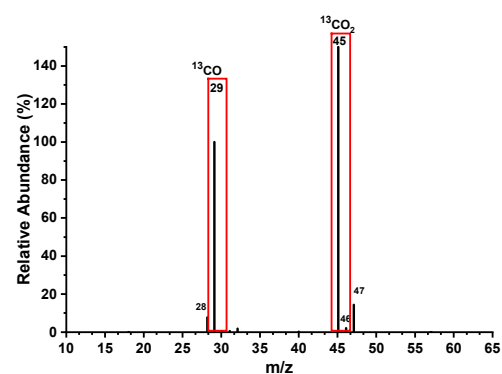

**Figure S5.** The product analysis by GC/MS chromatograms for photocatalytic CO<sub>2</sub> reduction in <sup>13</sup>CO<sub>2</sub>-saturated DMA-TEOA (v/v=9:1) solution containing 1 mg catalyst and 28 mg BIH.

## 6. The characterization of recycled samples.

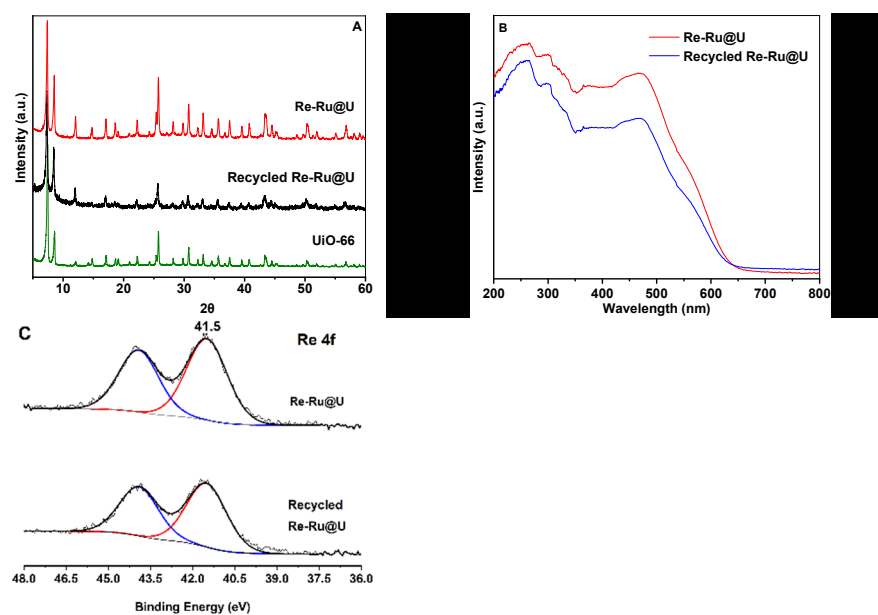

**Figure S6.** (A) XRD patterns, (B) UV-Vis spectra and (C) Re 4f XPS spectra of Re-Ru@U and recycled Re-Ru@U samples.

## 7. Performance comparison of Re-Ru@U with that of a hybrid catalyst.

**Table S3.** CO<sub>2</sub> conversion performances of Re and Ru complexes incorporated into different MOFs.

| Sample                                                  | Ru/Re<br>(molar<br>ratio) | Solvent              | $\lambda$ (nm) | Sacrificial<br>agent                  | H <sub>2</sub>   | CO               | HCOO-                                  | Ref.         |
|---------------------------------------------------------|---------------------------|----------------------|----------------|---------------------------------------|------------------|------------------|----------------------------------------|--------------|
| <b>Ru-MOF-253-Re</b>                                    | <b>0.31</b>               | DMF/H <sub>2</sub> O | 400~800        | 4.5 mmol<br>TEOA                      | TON(4h)=1.0      | TON(4 h)=5.4     | TON(4 h)=23.4                          | <sup>1</sup> |
| <b>Ru<sub>0.04</sub>-Re<sub>0.04</sub>-BPy-<br/>PMO</b> | <b>0.84</b>               | DMF                  | 420 nm         | 301 mmol<br>TEOA<br>1.4 mmol BIH      | TON(24h)=1.7     | TON(12<br>h)=15  | \                                      | <sup>2</sup> |
| <b>ReRu-66</b>                                          | <b>2.7</b>                | ACN                  | 450 nm         | 1.5 mmol<br>TEOA                      | \                | TON(1.5<br>h)=16 | \                                      | <sup>3</sup> |
|                                                         |                           | ACN                  | 450 nm         | 1.5 mmol BIH                          | \                | TON(5<br>h)=419  | \                                      |              |
| <b>Zr-MBA-Ru/Re-<br/>MOF</b>                            | <b>3.9</b>                | ACN-H <sub>2</sub> O | > 400 nm       | 1.5 mmol<br>TEOA 9.33 $\mu$ M<br>BANH | 55.6 $\mu$ mol/g | TON(48h)=57      | CH <sub>4</sub> =345.8 $\mu$ mo<br>l/g | <sup>4</sup> |
| <b>ReRu-MIL</b>                                         | <b>7.9</b>                | ACN                  | 450 nm         | 1.5 mmol<br>TEOA                      | \                | TON(24<br>h)=9.2 | \                                      | <sup>5</sup> |
|                                                         |                           | ACN                  | 450 nm         | 1.5 mmol BIH                          | \                | TON(24<br>h)=344 | \                                      |              |
| <b>Re-Ru@U</b>                                          | <b>0.08</b>               | DMA                  | > 420 nm       | 3.7 mmol<br>TEOA<br>0.12 mmol BIH     | \                | TON(12<br>h)=15  | \                                      | This<br>work |

## References

- Deng, X.; Alberio, J.; Xu, L.; García, H.; Li, Z. Construction of a Stable Ru–Re Hybrid System Based on Multifunctional MOF-253 for Efficient Photocatalytic CO<sub>2</sub> Reduction. *Inorg. Chem.* **2018**, *57*, 8276–8286.
- Waki, M.; Yamanaka, K.I.; Shirai, S.; Maegawa, Y.; Goto, Y.; Yamada, Y.; Inagaki, S. Re(bpy)(CO)<sub>3</sub> Cl Immobilized on Bipyridine-Periodic Mesoporous Organosilica for Photocatalytic CO<sub>2</sub> Reduction. *Chemistry* **2018**, *24*, 3846–3853.
- Stanley, P.M.; Haimerl, J.; Thomas, C.; Urstoeger, A.; Schuster, M.; Shustova, N. B.; Casini, A.; Rieger, B.; Warnan, J.; Fischer, R.A. Host-Guest Interactions in a Metal-Organic Framework Isorecticular Series for Molecular Photocatalytic CO<sub>2</sub> Reduction. *Angew. Chem. Int. Ed. Engl.* **2021**, *60*, 17854–17860.
- Karmakar, S.; Barman, S.; Rahimi, F. A.; Maji, T. K. Covalent grafting of molecular photosensitizer and catalyst on MOF-808: effect of pore confinement toward visible light-driven CO<sub>2</sub> reduction in water. *Energy Environ. Sci.* **2021**, *14*, 2429–2440.
- Stanley, P. M.; Thomas, C.; Thyrhaug, E.; Urstoeger, A.; Schuster, M.; Hauer, J.; Rieger, B.; Warnan, J.; Fischer, R.A. Entrapped Molecular Photocatalyst and Photosensitizer in Metal–Organic Framework Nanoreactors for Enhanced Solar CO<sub>2</sub> Reduction. *ACS Catal.* **2021**, *11*, 871–882.
